# Supplementary material
Source: Springer Nature journal article supplement (https://www.springermedizin.de/resource/supplementary/12916_2013_850_MOESM5_ESM.pdf/9598472)

### Zhejiang

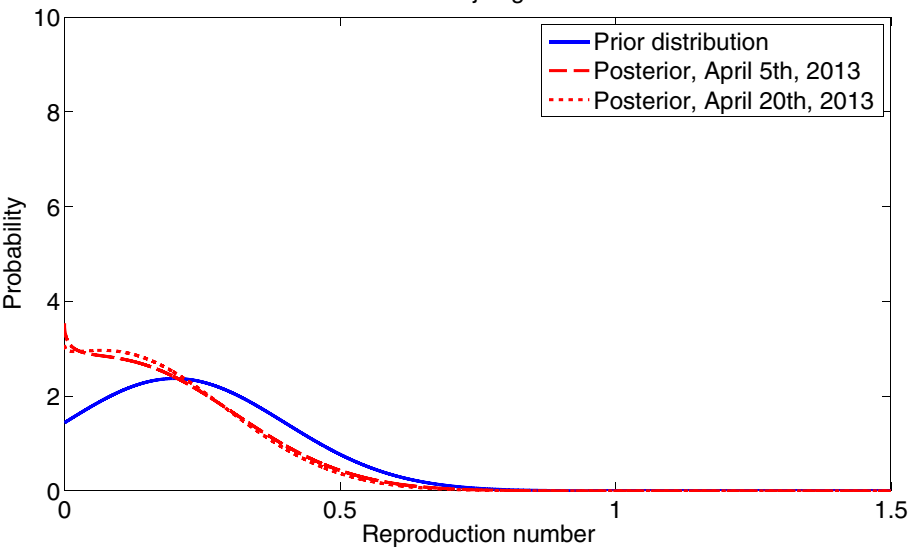

### Shanghai

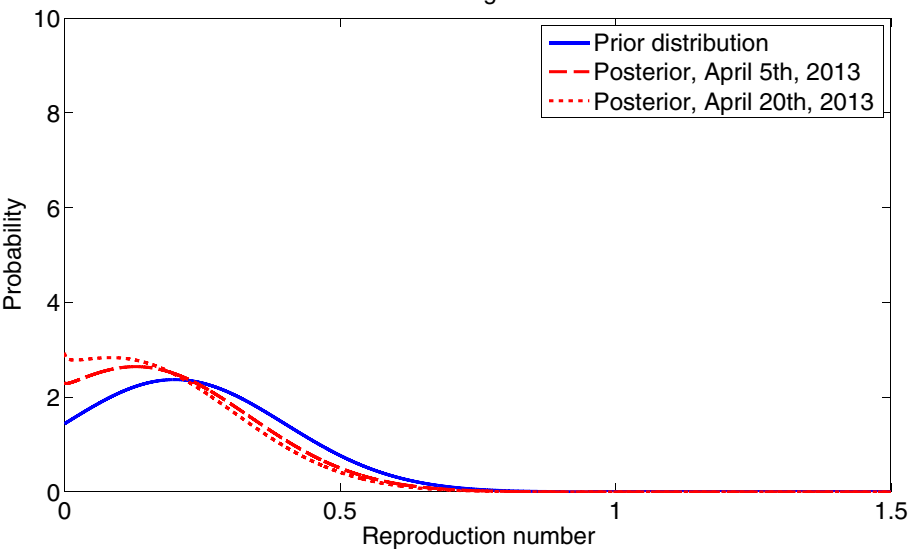

Supplement: MOESM5 [file 9598472]
